# Supplementary material
Source: publisher figshare collection journal article supplement (https://gsapubs.figshare.com/ndownloader/files/24125567)
Supplement: Supplementary file 1 [file 24125567]

## Sheet: Table S1
TABLE S1. PALEOMAGNETIC ANALYSES OF THE BASALTS OF TENNANT, DRY LAKE AND HAMMOND CROSSING
Unit / Sample number	Latitude (°N)	Longitude (°W)	N/No	Exp.	I	D	α95	k	R	Platitude (°N)	Plongitude (°E)
Basalt of Tennant
1A592	41.672	121.946	14/15	30+	61.4	8.9	1.4	792	13.9836	83.4	318
1A607	41.646	121.963	13/13	30+	61.3	6.7	1.4	904	12.9867	85	316.9
1A620	41.646	121.963	11/12	30+	61.5	9.1	1.5	924	10.9892	83.2	316.3
1A632	41.649	121.931	10/12	30+	63.7	12.6	2.4	402	9.97762	80.2	302.1
1A644	41.638	122.016	11/12	20+	65.4	6.8	1	2308	10.9957	82.3	274.9
1A656	41.651	121.875	11/12	30+	59.1	0	1.3	1320	10.9924	88.2	58.1
1A668	41.701	121.853	12/12	30+	61.5	358.7	1.2	1367	11.992	88.7	190.3
1A680	41.598	121.881	9/12	20+	57.9	6.4	1.7	872	8.99082	84.2	358.1
1A692	41.598	121.881	10/12	30+	62.5	7	1.9	655	9.98626	84.4	302.6
1A728	41.574	121.917	8/12	30+	62.5	14	2	773	7.99095	79.5	310.7
A3254	41.529	121.853	11/12	20+	65.3	11.9	1.6	853	10.9883	79.7	289.4
A3266	41.557	121.868	9/12	20+	61.9	1.9	1.7	904	8.99115	87.9	280
A3278	41.572	121.87	12/12	Pl	63.4	8.8	3.2	214	---	82.8	297.3
B4229	41.729	121.999	11/12	30+	59.3	12.2	2.7	292	10.9657	80.6	333.7
B4253	41.707	121.847	12/12	20	62.6	10.7	1.2	1391	11.9921	81.8	308.7
B4338	41.643	121.863	12/12	20	61.5	10.1	1.3	1114	11.9901	82.5	317.4
B4362	41.655	122.012	12/12	30	65.7	354.9	1.6	767	11.9857	82.7	209.7
882B0	41.651	122.013	8/8	30	64.5	5.8	1.3	1828	7.99617	83.7	278.1
			18/18		62.4	7	1.4	630	17.973	84.4	303.8
Basalt of Dry Lake
A3230	41.438	121.794	11/12	30+	62.7	11	1.7	704	10.9858	81.5	306.1
B4326	41.408	121.778	12/12	30+	61.6	3.4	5.8	58	11.8091	87.1	299.1
B7366	41.484	121.826	11/12	Pl	61.7	8.2	3.5	221	---	83.8	312.5
B7390	41.421	121.755	12/12	20+	62.4	12.4	2	469	11.9766	80.6	309.6
804B8	41.426	121.762	12/12	20+	62.6	9.1	2.4	321	11.9657	82.8	304.1
808B0	41.38	121.74	8/8	20	67.7	5.2	3.3	279	7.97494	80.1	257.7
816B0	41.391	121.735	8/8	Pl	64.8	4.2	1.9	727	---	83.9	266.3
824B0	41.438	121.744	7/9	30	61.3	5.9	2.4	637	6.99057	85.5	314.2
833B0	41.412	121.717	6/9	30	56	10.8	2.7	617	5.9919	80.3	355
852B8	41.404	121.719	10/12	20+	69.3	9.9	2.5	380	9.97634	76.7	265
8725B	41.338	121.715	8/8	Li	61.3	12.7	2.2	656	7.9893	80.5	317.6
			9/11		62.9	8.1	1.7	938	8.99147	83.4	298.8
Basalt of Hammond Crossing
4785B	41.205	121.631	8/8	Li	64.1	13.9	1.8	914	7.99234	78.9	298.7
5105B	41.184	121.589	8/8	Li	61.9	7.9	1.9	831	7.9916	83.8	307.5
8826B	41.175	121.571	8/8	Li	59.4	6.3	1.8	976	7.9928	85.1	337.7
8986B	41.186	121.615	7/8	Mx	63.8	8.1	3.3	346	6.9826	82.7	289.7
			4/4		62.3	8.9	3	935	3.99679	83	305
Note: N/No - number of cores used compared with the number originally collected at the site; Exp. - nature of site demagnetization; Li - indicates that a vector-component lines analysis was used, Pl - indicates that a plane fit on an equal-area diagram was used, and Mx - indicates that a mixture of lines and planes was used to define the mean remanent direction of magnetization; I - remanent incl…

## Sheet: G48076
Downs, D.T., et al., 2020, Simultaneous Middle Pleistocene eruption of three widespread tholeiitic basalts in northern California (USA): Insights into crustal magma transport in an actively extending back arc: Geology, v. 48, https://doi.org/10.1130/G48076.1
